# Supplementary material for: HPR1 Is Required for High Light Intensity Induced Photorespiration in Arabidopsis thaliana
Source: Int J Mol Sci. 2022 Apr 18;23(8):4444. doi: 10.3390/ijms23084444 (PMC9030206; doi:10.3390/ijms23084444)
Supplement: Supplementary file 1 [file ijms-23-04444-s001.zip › ijms-1667936-supplementary.pdf]

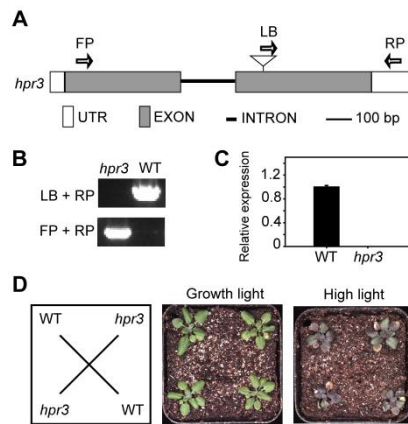

**Supplemental Figure S1.** Identification of the *hpr3* mutant. **(A)** Genomic structure model of *HPR3*. Gray rectangles show the open reading frame, black line shows intron, white rectangles show untranslated regions, and triangles represent T-DNA insertion. **(B)** PCR analysis of genomic DNA from the WT and *hpr3* plants. LB, PR and FP indicate primers which locations are shown in A. **(C)** The expression of *HPR3* in WT and *hpr3* plants was analyzed by qRT-PCR. **(D)** Phenotypes of WT and *hpr3* with different light intensity treatments. WT and *hpr3* grown under growth light of  $80 \mu\text{mol}\cdot\text{m}^{-2}\cdot\text{s}^{-1}$  for 3 weeks, were treated under growth light with  $80 \mu\text{mol}\cdot\text{m}^{-2}\cdot\text{s}^{-1}$  and high light with  $350 \mu\text{mol}\cdot\text{m}^{-2}\cdot\text{s}^{-1}$  for another week, respectively.
